# Supplementary material
Source: PubMed Central journal article supplement (PMC2430359)
Supplement: 0710929105_Supplemental_PDF.pdf [file 0710929105_Supplemental_PDF.pdf]

# Supporting Information

Palmer *et al.* 10.1073/pnas.0710929105

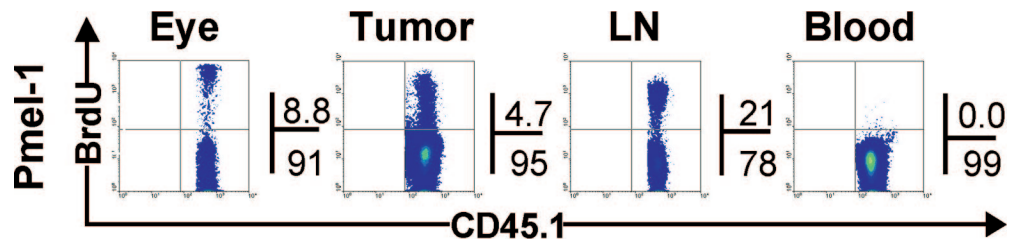

**Fig. S1.** MDA-specific CD8<sup>+</sup> T cells proliferate in the eye. Proliferation of pmel-1 CD45.1<sup>+</sup> T cells in multiple tissues 4 days after adoptive cell transfer and 2 h after BrdU injection (i.p.). Flow cytometric analysis of CD45.1<sup>+</sup>BrdU<sup>+</sup> T cells in multiple organs after perfusion and harvest. Data are derived from 3 mice pooled and are representative of 2 independent experiments.

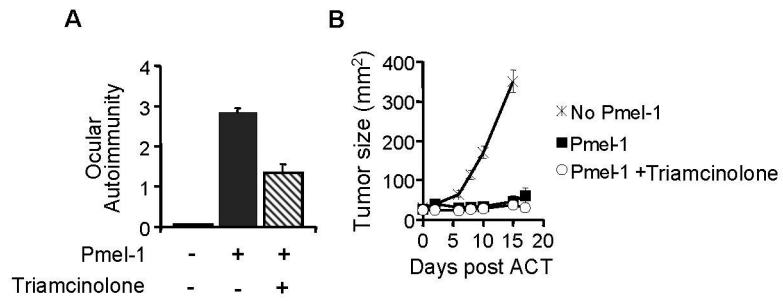

**Fig. 52.** Administration of high doses of steroids locally mitigate ocular autoimmunity without impairing the antitumor effect. (A) Evaluation of ocular autoimmunity 5 days after ACT of pmel-1 with or without periocular injection of triamcinolone. (B) Administration of local steroids does not impair tumor therapy. Mice treated with or without local steroids 1 day after ACT-therapy had durable regression of established tumor ( $n = 5$  mice per group). Data are representative of two independently performed experiments.



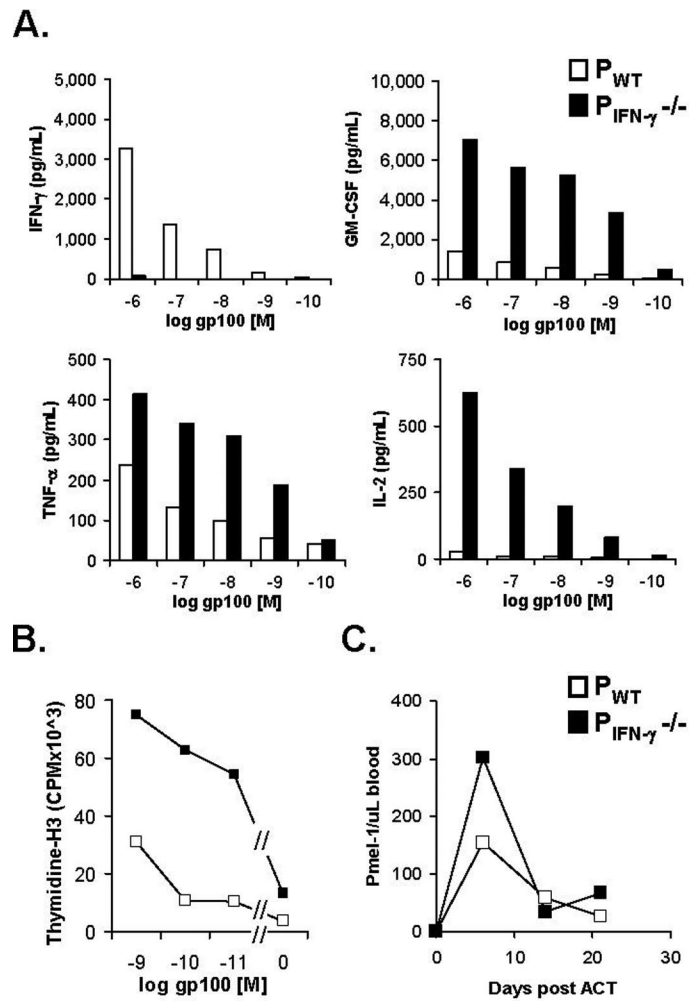

**Fig. S4.** IFN- $\gamma$ -deficient pmel-1 T cells are hyperproliferative and secrete increased levels of cytokines. (A) Absence of IFN- $\gamma$  results in increased effector cytokine production of activated pmel-1 T cells. Concentrations of IFN- $\gamma$ , GM-CSF, TNF- $\alpha$  and IL-2 in supernatants from an overnight coculture of one week stimulated wild-type or IFN- $\gamma$ <sup>-/-</sup> pmel-1 T cells with irradiated splenocytes pulsed with gp100<sub>25-33</sub> determined by ELISA. (B) Increased *in vitro* proliferation of IFN- $\gamma$  deficient pmel-1 T cells. Thymidine-H3 incorporation in an overnight coculture of one week stimulated wild-type or IFN- $\gamma$ <sup>-/-</sup> pmel-1 T cells with irradiated splenocytes pulsed with gp100<sub>25-33</sub>. (C) Increased *in vivo* proliferation of IFN- $\gamma$  deficient pmel-1 T cells. Enumeration of congenic wild-type or IFN- $\gamma$ <sup>-/-</sup> pmel-1 T cells in blood after adoptive transfer determined by flow cytometry analysis and absolute lymphocyte count.

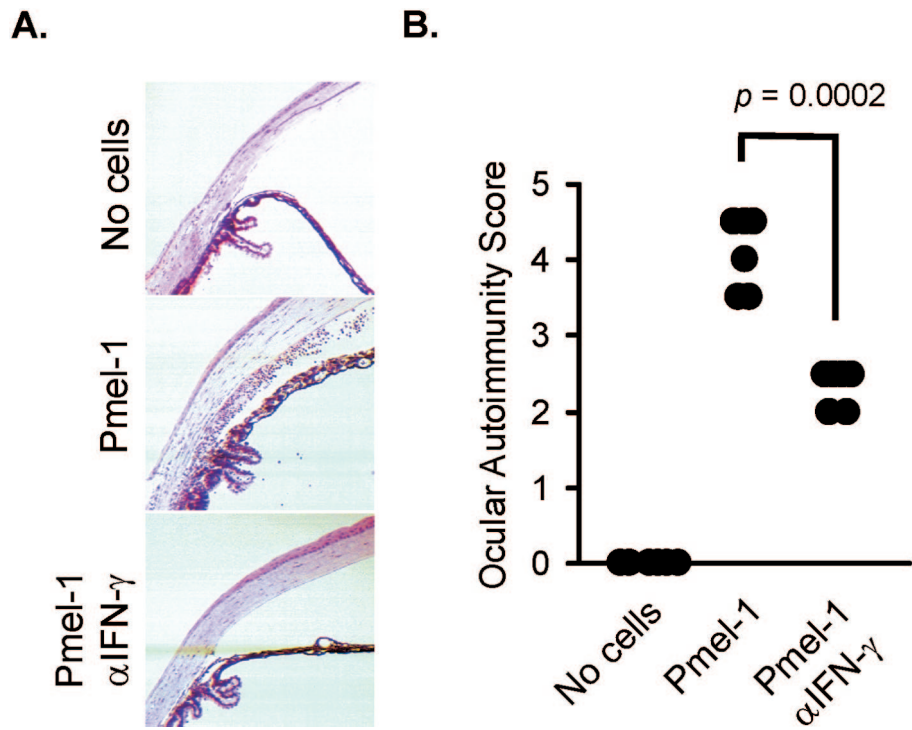

**Fig. 55.** Administration of IFN- $\gamma$  neutralizing antibody diminishes ocular immunity. (A) Evaluation of ocular autoimmunity after ACT of pmel-1 with or without the administration IFN- $\gamma$  neutralizing antibody. Images are representative of multiple fields. (B) The induction of ocular autoimmunity was blindly evaluated 5 days after the ACT. Data are representative of 2 independently performed experiments.
